# Supplementary material for: Fabrication of MEA based on sulfonic acid functionalized carbon supported platinum nanoparticles for oxygen reduction reaction in PEMFCs
Source: Royal Society of Chemistry journal article supplement (doi:10.1039/c5ra09201a), 2015-01-01
Supplement: c5ra09201a1.pdf [file c5ra09201a1.pdf]

# Supporting Information

# **Fabrication of MEA based on Sulfonic Acid Functionalized Carbon supported Platinum Nanoparticles for Oxygen Reduction Reaction in PEMFCs**

**Hussein Gharibi<sup>\*1,2</sup>, Fatemeh Yasi<sup>1</sup>, Mohammad Kazemeini<sup>3</sup>, Ahmad Heydari<sup>1</sup> and Farhad Golmohammadi<sup>1</sup>**

*<sup>1</sup>Department of Chemistry, Faculty of Science, Tarbiat Modares University, P.O. Box 14115-175, Tehran, Iran*

*<sup>2</sup>Department of Material Science & Engineering, 122 S Campus Drive, University of Utah, Salt Lake City, UT 84112, United States*

*<sup>3</sup> Department of Chemical and Petroleum Engineering, Sharif University of Technology, Tehran, Iran*

---

<sup>1</sup> Corresponding author. E-mail addresses: [h.gharibi@utah.edu](mailto:h.gharibi@utah.edu); [h.gharibi@gmail.com](mailto:h.gharibi@gmail.com);

[gharibi@modares.ac.ir](mailto:gharibi@modares.ac.ir)

### Formation of nitrosonium ion

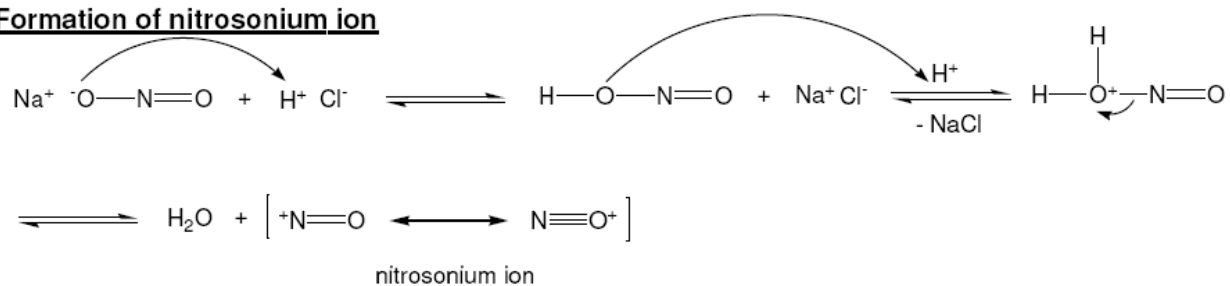

### Formation of diazotized sulfanilic salt

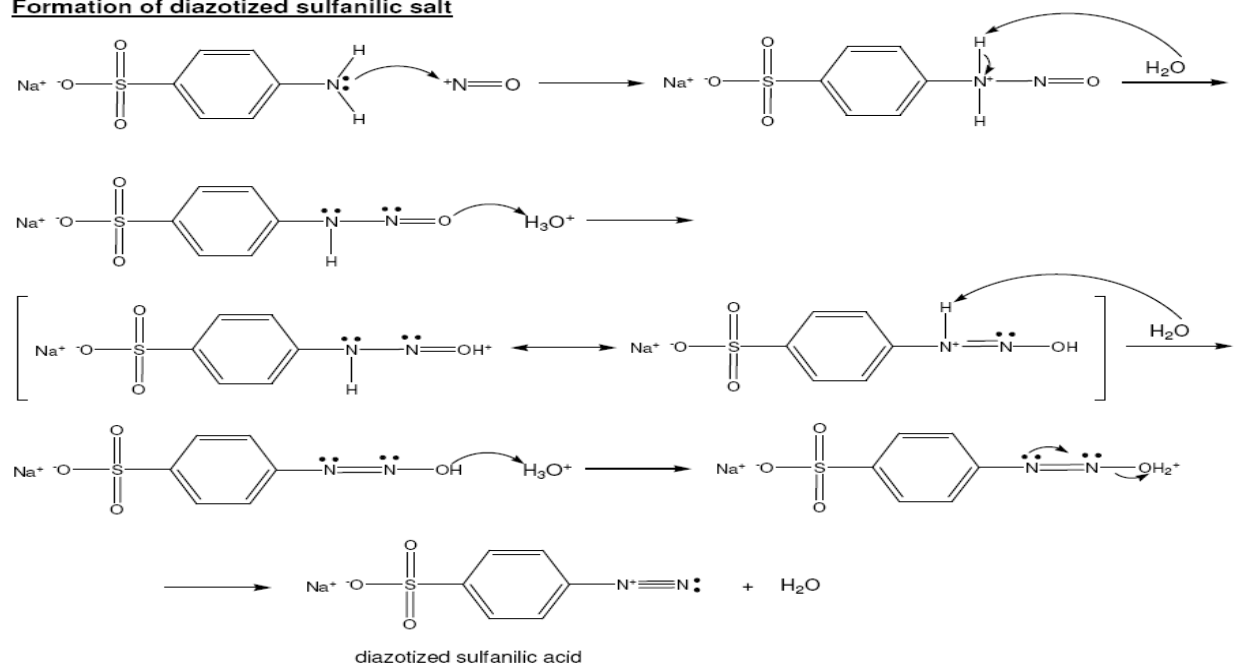

Fig. S1. Schematic diagram for the formation of 4-sulfobenzendiazonim Salts.

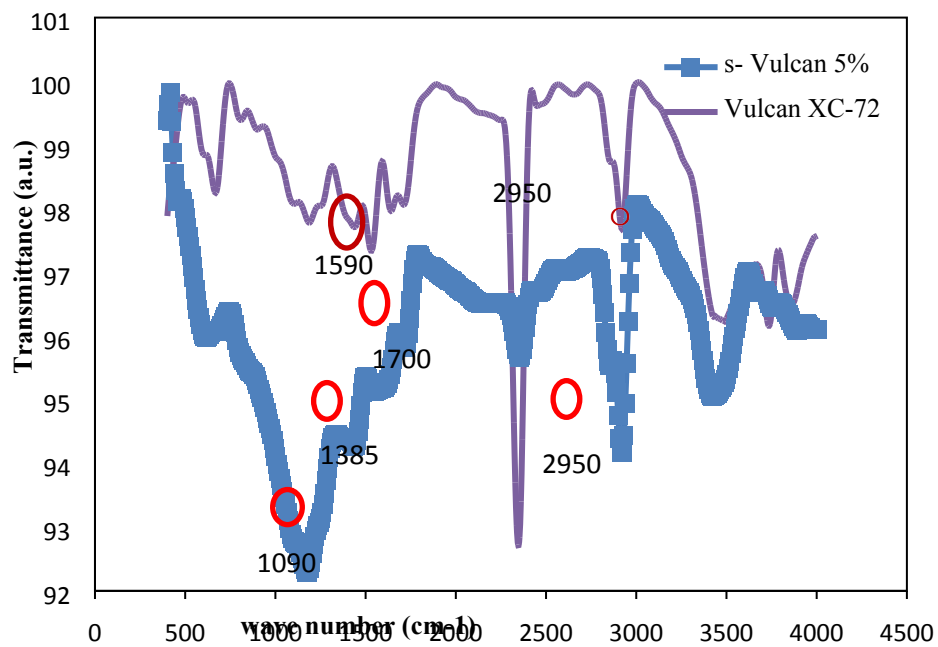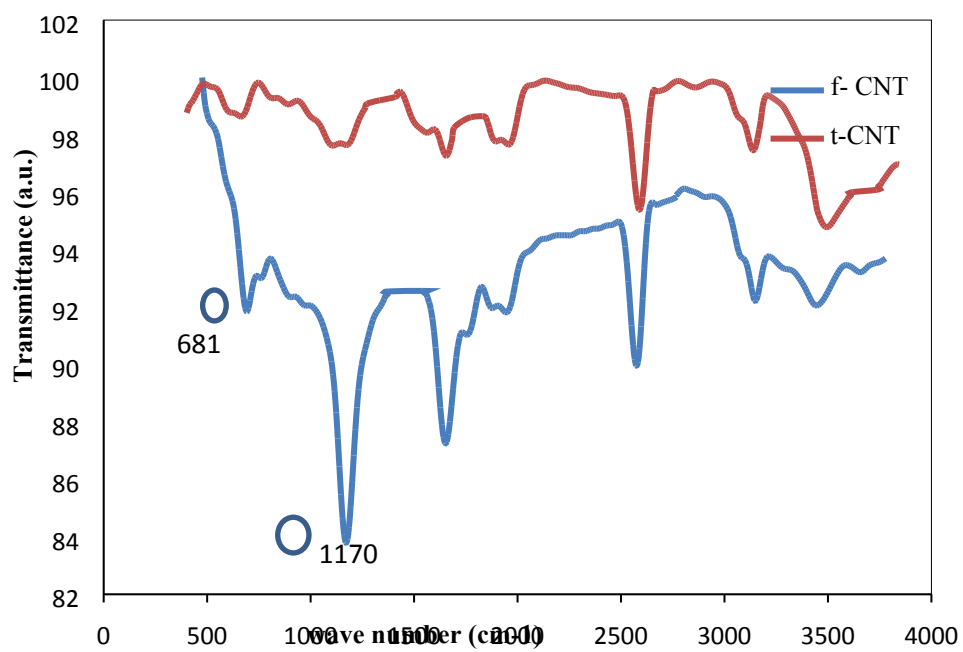

**Fig. S2.** FTIR spectra for (a) unmodified and modified Vulcan XC-72.  
 (b) Purified (t- CNT) and modified (f-CNT) MWCNTs.

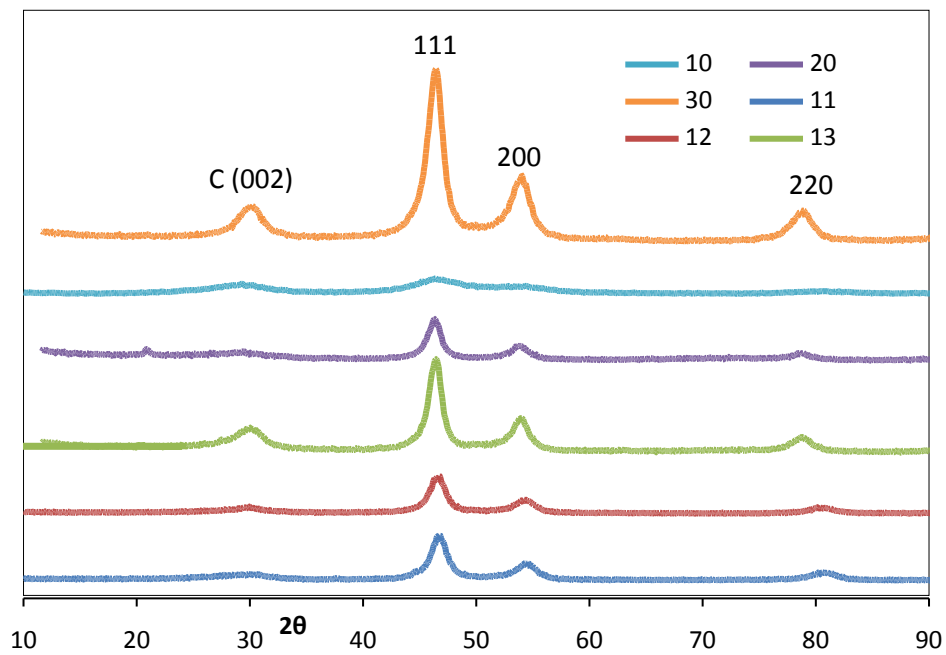

**Fig. S3.** X-ray diffraction (XRD) patterns for different catalysts.

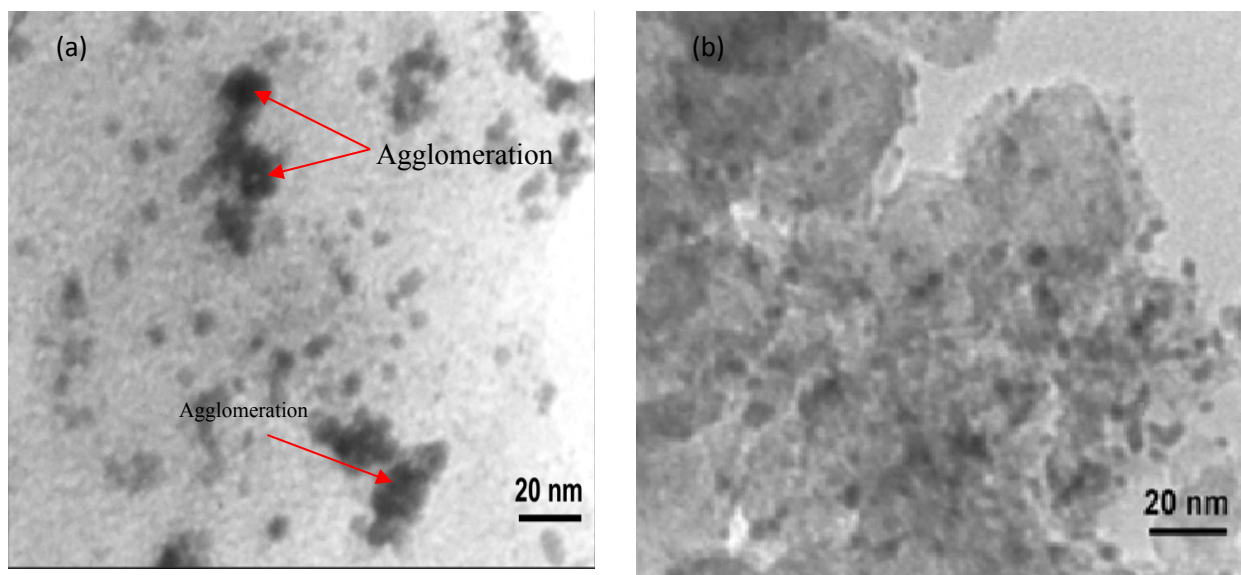

**Fig S4.** TEM images of (a) commercially available Electrochem Pt/C catalyst (Pt loading 10 wt%). (b) Pt/ (f- Vulcan XC-72R(25%)+f-MWCNT(75%)) catalyst (Pt loading 10 wt%).

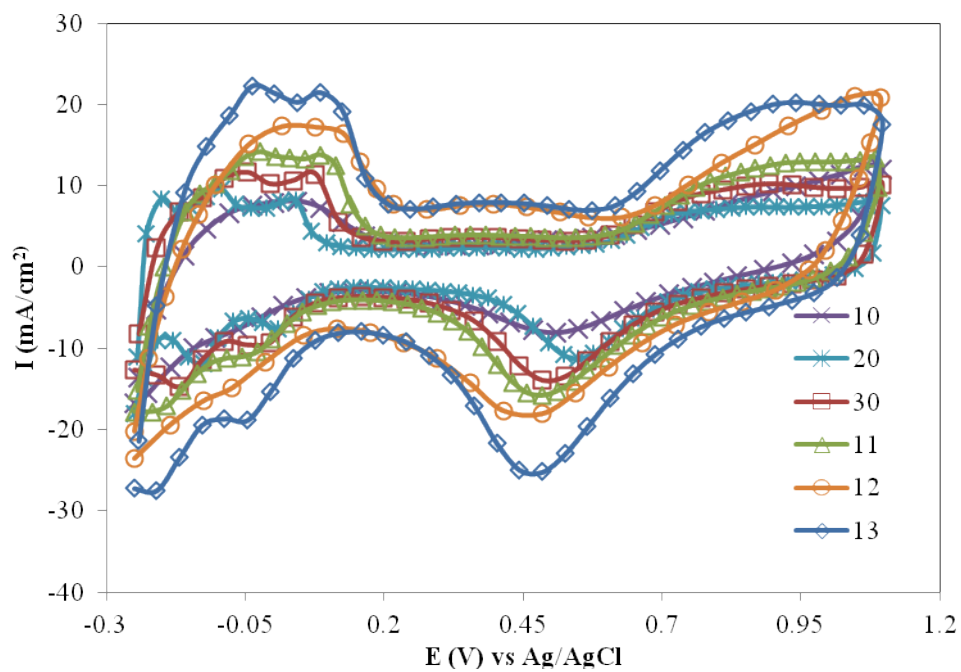

**Fig. S5.** Cyclic voltammograms for the modified catalyst with varying phenylsulfonic acid loading (in w/o) and amounts of MWCNTs ( $0.031415 \text{ cm}^2 \text{ GC}$  at  $25^\circ\text{C}$ ; under argon atmosphere; scan rate =  $50 \text{ mVs}^{-1}$ ).

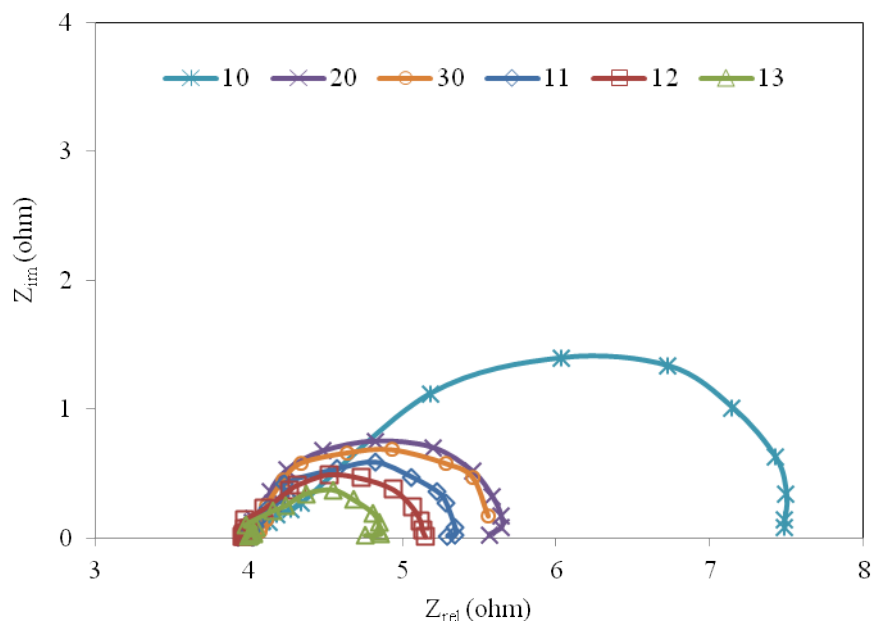

(b)

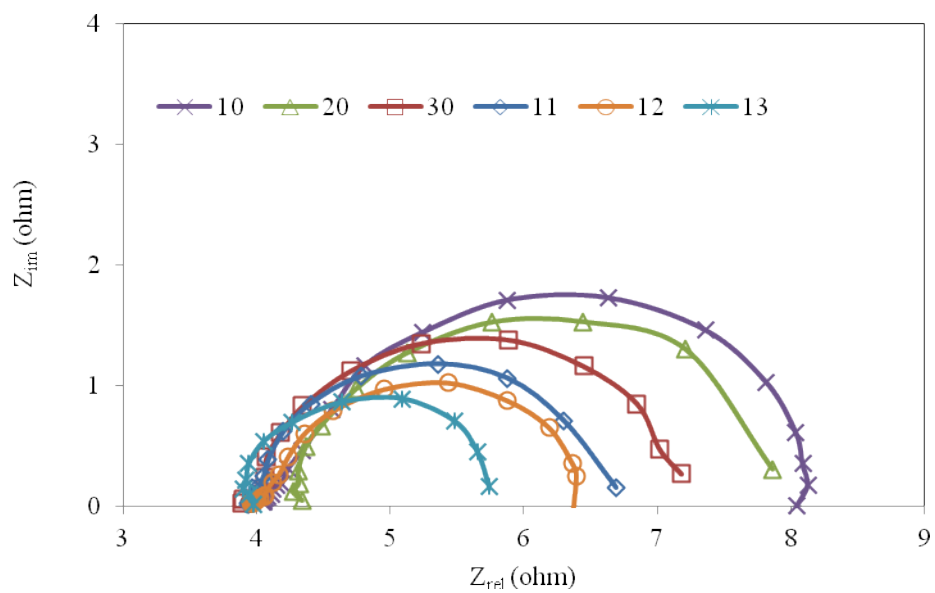

**Fig. S6.** Nyquist plots of the impedance response from 100 kHz to 30 mHz for different catalysts under oxygen atmosphere (a) at 300 mV (b) at 600 mV vs. Ag/AgCl at 25 °C. (Pt loading: 0.5 mgcm<sup>-2</sup>).

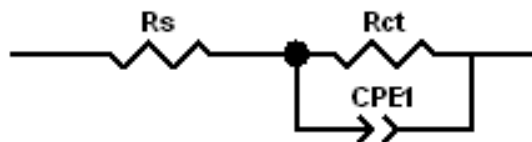

**Fig. S7.** Schematic representation of the equivalent circuit for the different electrodes.

(a)



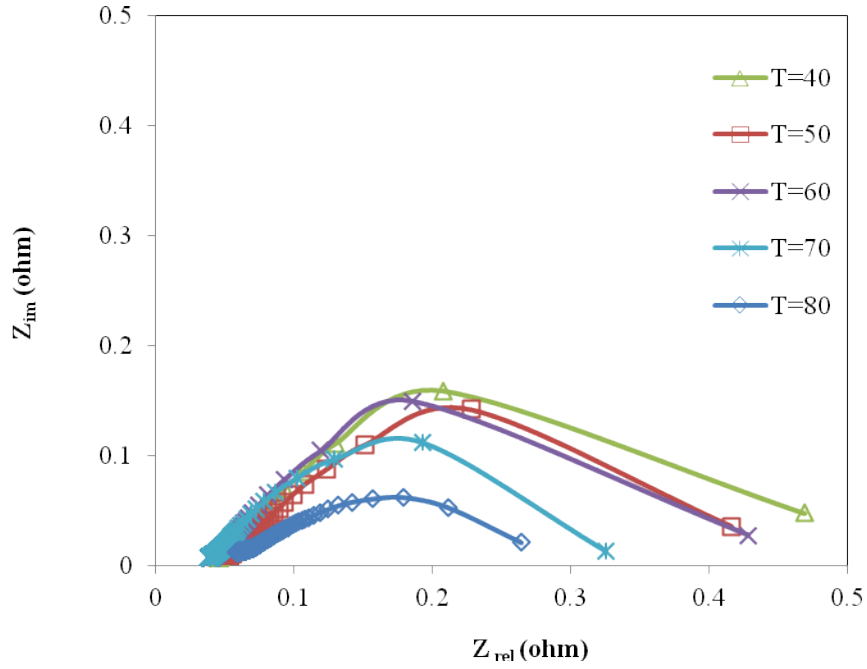

(b)

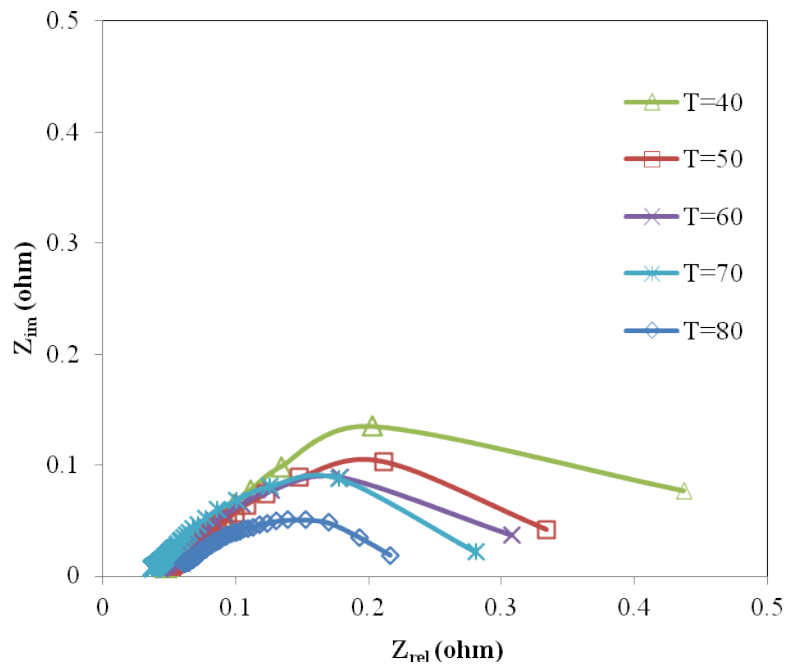

(c)

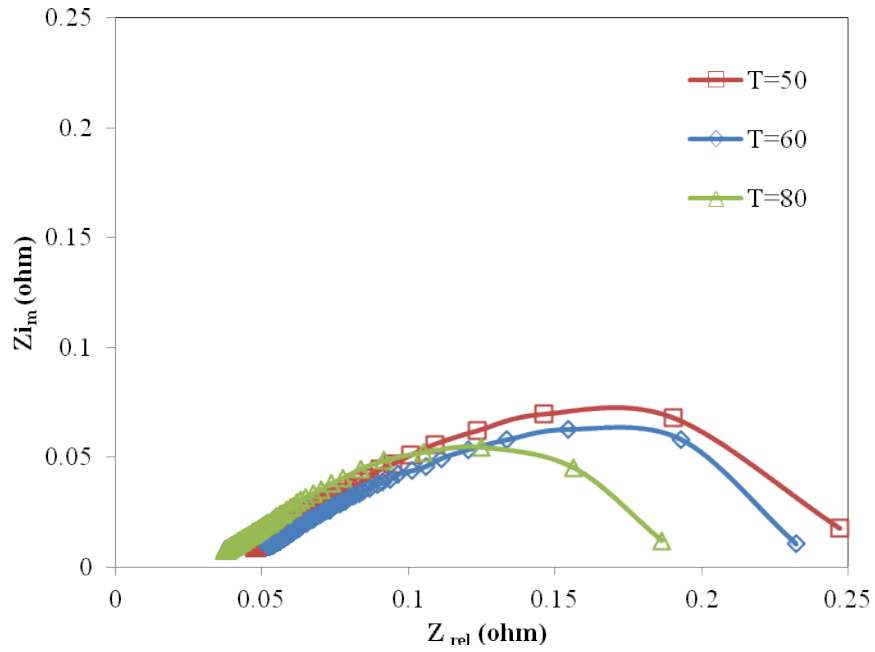

**Fig. S8.** Impedance spectra of a single cell with MEA-1 from 1 mHz to 1000 kHz , 90% relative humidity, different cell temperatures and 1.5 atm back pressure for the anode and cathode. The flow rates are 300 mlmin<sup>-1</sup> for hydrogen and 500 mlmin<sup>-1</sup> for oxygen (a) at 0.3V (b) at 0.5 V (c) at 0.7 V.

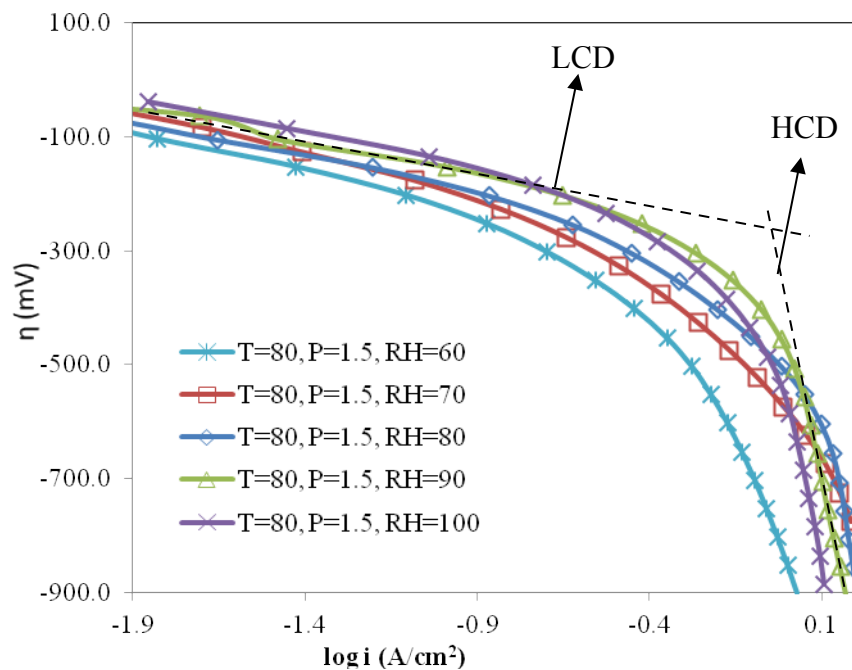

**Fig S9.** The plot of  $\eta$  vs.  $\log i$  for different relative humidities ( $T=80^\circ\text{C}$  and a gas pressure at the back of the electrodes of 1.5 atm)

(a)

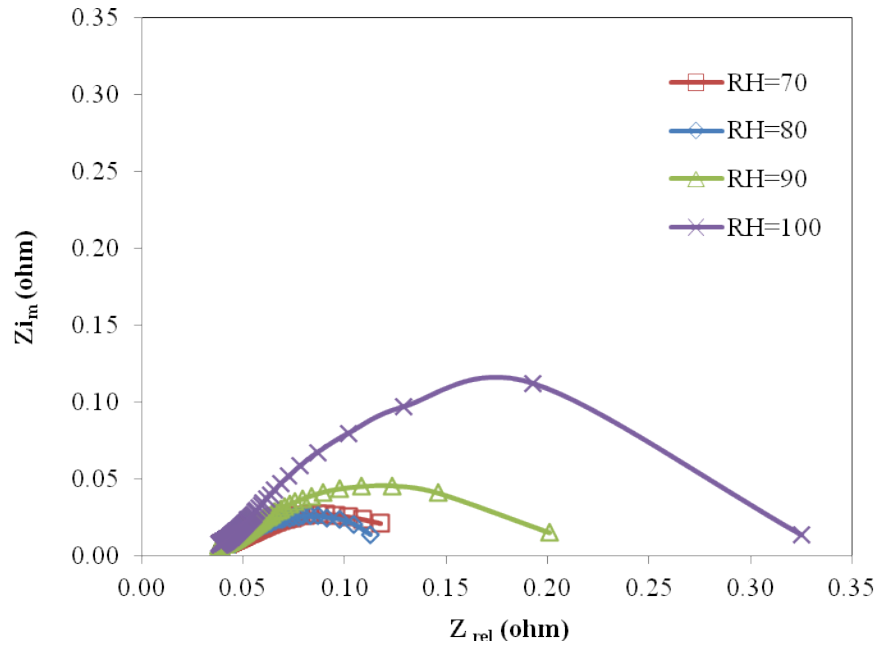

(b)

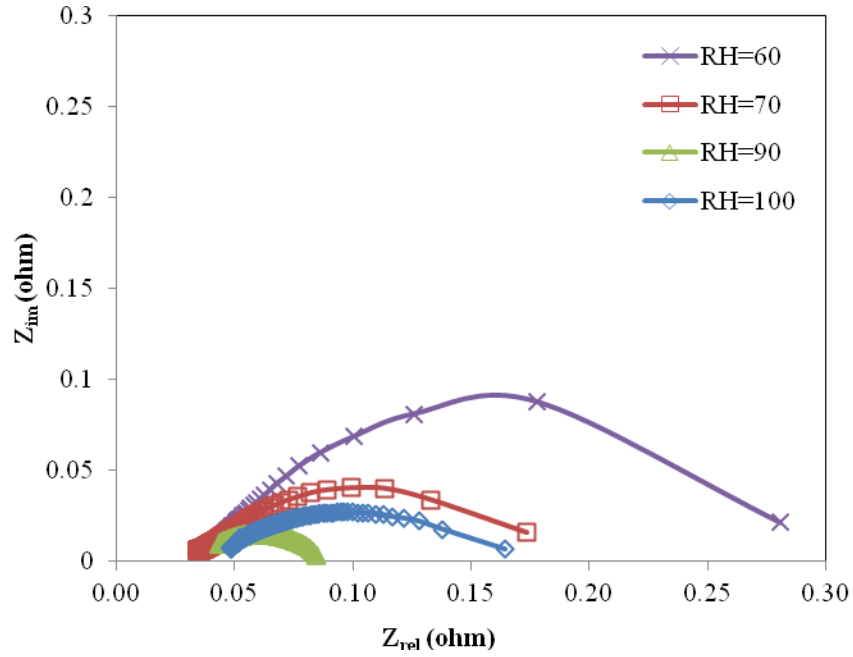

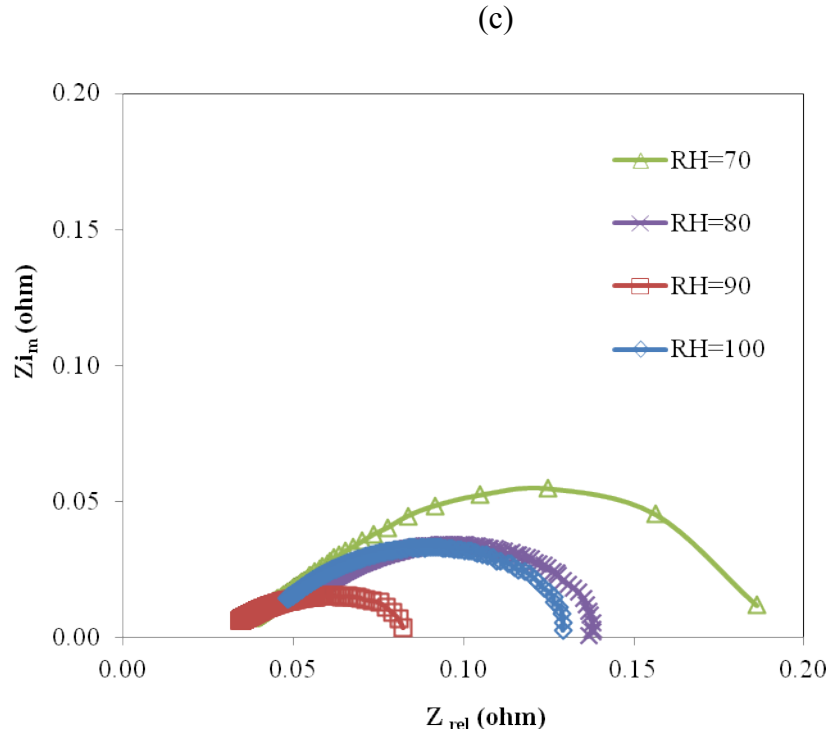

**Fig. S10.** Impedance spectra of a single cell with MEA-1, from 1 mHz to 1000 kHz, for different relative humidities, cell temperature 80°C and 1.5 atm absolute back pressure for the anode and cathode. The flow rates are 300 mlmin<sup>-1</sup> for hydrogen and 500 mlmin<sup>-1</sup> for oxygen (a) at 0.3 V (b) at 0.5 V (c) at 0.7 V.

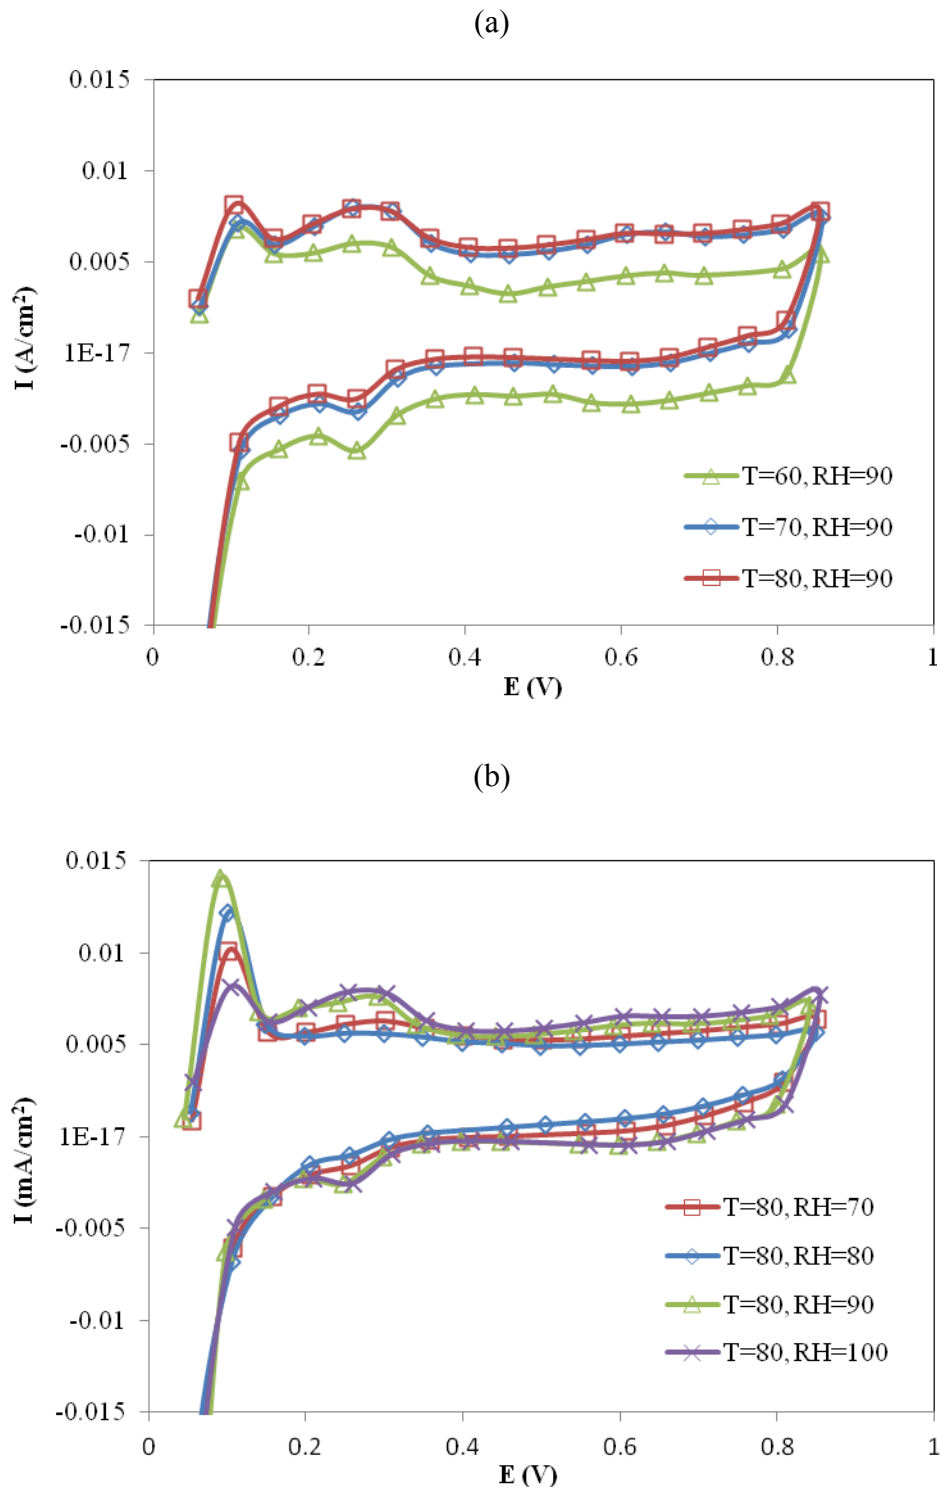

**Fig. S11.** Cyclic voltammogram of a single cell with MEA-1 (a) effect of temperature (b) effect of relative humidity ( $RH$ ) (scan rate= $50 \text{ mVs}^{-1}$ , cell area: $6.25 \text{ cm}^2$ ,  $N_2$  and  $H_2$  streams at cathode and anode, respectively, and an anode and cathode absolute back pressure of 1.5 atm).

**Fig. S3.** As shown in [Fig. S3](#), the first peak located at a  $2\theta$  value of about  $30^\circ$  referred to the graphite (0 0 2) plane of the MWCNT and Vulcan XC-72R support. The other three peaks were characteristic of face centered cubic (fcc) crystalline Pt, corresponding to the planes (1 1 1), (2 0 0), (2 2 0) and at  $2\theta$  values of about  $46^\circ$ ,  $54^\circ$ ,  $80^\circ$ .

**Fig. S7.** In this circuit, the high frequency intercept on the real axis is due to solution resistance ( $R_s$ ). A parallel combination of  $R_{ct}$  and  $CPE$  has been analyzed to form the semicircle, whose diameter has been considered as the charge transfer resistance due to oxygen reduction reaction (ORR) and  $CPE$  indicates the double layer capacitance. Considering the porous nature of electrodes, the double layer capacitance is expressed as constant phase elements ( $CPE$ ) in the equivalent circuit model <sup>36</sup>.
